# Supplementary material
Source: Research Square preprint supplement (doi:10.21203/rs.3.rs-8760264/v1)
Supplement: Supplementary file 1 [file cb59b4760e44aa1a60e90e48.docx]

**A Novel Additive of Peony Seed Cake to Enhance Alfalfa Silage Quality: Integrating Metabolomic and Microbial Community Perspectives**

Mingxin Wu1, Jiakun Xu2, 3, Xuekai Wang1, Yanli Lin1, Yufan Lin1, Jichen Li1, Kuikui Ni1 and Fuyu Yang1*

1 College of Grassland Science and Technology, China Agricultural University, Beijing 100193, China.

2 State Key Laboratory of Forage Breeding-by-Design and Utilization, Institute of Botany, Chinese Academy of Sciences, Beijing 100093, China.

3 College of Advanced Agricultural Sciences, University of Chinese Academy of Sciences, Beijing 100049, China.

***Correspondence:** Fuyu Yang

[yfuyu@126.com](mailto:yfuyu@126.com).

**Table S1 Nutritional composition and microbial population of PSC and fresh alfalfa.**

| Items | Fresh Alfalfa | PSC |
| --- | --- | --- |
| DM (%) | 28.74±1.22 | 88.78±0.82 |
| CP (%DM) | 21.46±1.74 | 31.96±0.70 |
| NDF (%DM) | 34.79±1.55 | 27.67±0.85 |
| ADF (%DM) | 27.38±1.24 | 13.51±2.16 |
| WSC(%DM) | 3.08±0.07 | 24.14±0.28 |
| Lactic acid bacteria (log₁₀ cfu/g FM) | 6.56±0.09 | - |
| Coliform (log₁₀ cfu/g FM) | 6.60±0.07 | - |
| Yeasts (log₁₀ cfu/g FM) | 5.50±0.03 | - |
| Mold (log₁₀ cfu/g FM) | - | - |

DM, dry matter; CP, crude protein; WSC, water soluble carbohydrate; NDF, neutral detergent fiber; ADF, acid detergent fiber. FM, fresh matter; “-”, not detected.

**Table S2 Sensory evaluation of alfalfa silage with varying PSC proportions**

| Group | Color | Odor | Structure | DLG score | Quality class |
| --- | --- | --- | --- | --- | --- |
| CK | 1 | 10 | 1 | 12 | Fair |
| R10 | 2 | 12 | 2 | 16 | Good |
| R30 | 2 | 12 | 3 | 17 | Good |
| R50 | 1 | 11 | 2 | 14 | Good |
| CKL | 1 | 10 | 1 | 13 | Fair |
| R10L | 2 | 12 | 3 | 17 | Good |
| R30L | 2 | 14 | 3 | 19 | Very good |
| R50L | 2 | 12 | 2 | 16 | Good |

**Q**uality class: Very good (18–20), Good (14–17), Fair (10–13), Poor (5–9), and Corrupted (0–4). CK, R10, R30, and R50 represent PSC inclusion levels of 0%, 10%, 30%, and 50% based on fresh weight, respectively. CKL, R10L, R30L, and R50L correspond to the same PSC inclusion levels as CK, R10, R30, and R50, but with LAB inoculation.

**Table S3 Composition and average contents of volatiles emitted from silages under different treatments (CK, CKL, R30, R30L) during ensiling (day 3, 14, 30) (µg/g).**

| **No.** | **Compounds** | **CK_3D** | **CKL_3D** | **R30_3D** | **R30L_3D** | **CK_14D** | **CKL_14D** | **R30_14D** | **R30L_14D** | **CK_30D** | **CKL_30D** | **R30_30D** | **R30L_30D** |
| --- | --- | --- | --- | --- | --- | --- | --- | --- | --- | --- | --- | --- | --- |
| 1 | (Z)-3-Hexen-1-ol | - | 0.057 | 0.233 | - | - | 0.015 | - | 0.019 | 0.093 | - | 0.231 | 0.062 |
| 2 | (E)-2-Hexenal | 0.441 | 0.034 | 0.046 | 0.281 | 0.118 | 0.078 | - | - | - | 0.053 | - | - |
| 3 | Propyl cyclopropane | - | - | - | - | 0.079 | 0.054 | - | - | - | - | - | - |
| 4 | 1-Hexanol | 0.187 | - | - | 0.033 | - | 0.067 | 0.096 | 0.063 | 0.080 | 0.084 | - | - |
| 5 | Styrene | 0.151 | 0.083 | - | 0.016 | 0.080 | 0.173 | 0.037 | 0.015 | 0.156 | 0.048 | 0.092 | 0.025 |
| 6 | (Z)-2-Penten-1-yl acetate | 0.035 | 0.017 | - | - | 0.018 | 0.072 | - | - | 0.018 | 0.009 | - | - |
| 7 | Methyl hexanoate | - | - | - | 0.017 | 0.022 | 0.017 | - | - | 0.033 | 0.011 | - | - |
| 8 | 3-Ethyl-1,5-octadiene | 0.053 | 0.017 | 0.015 | 0.010 | 0.025 | 0.017 | 0.012 | - | 0.022 | - | - | - |
| 9 | (E)-2-Heptenal | - | - | - | - | 0.022 | 0.020 | 0.080 | - | - | - | - | - |
| 10 | Benzaldehyde | 0.603 | 0.047 | 0.136 | 0.105 | 0.189 | 0.108 | 0.035 | 0.050 | 0.182 | 0.149 | 0.202 | 0.044 |
| 11 | 1-Octen-3-ol | 0.224 | 0.145 | 0.050 | 0.069 | 0.046 | 0.113 | 0.174 | 0.036 | - | - | 0.089 | 0.046 |
| 12 | 3-Octanone | 0.493 | 0.108 | 0.230 | 0.502 | 0.186 | 0.211 | - | - | 0.071 | 0.083 | - | - |
| 13 | 3-Octanol | 2.305 | 0.204 | 0.202 | 0.280 | 1.135 | 1.206 | 0.275 | 0.135 | 1.547 | 1.033 | 0.922 | 0.245 |
| 14 | (E, E)-2,4-Heptadienal | 0.206 | 0.573 | - | - | 0.186 | - | - | - | 0.294 | 0.187 | - | 0.101 |
| 15 | trans-2-(2-Pentenyl) furan | 0.363 | 0.096 | 0.125 | 0.116 | 0.133 | 0.145 | 0.160 | 0.056 | 0.103 | 0.201 | 0.380 | - |
| 16 | Ethyl (Z)-3-hexenoate | - | - | - | - | - | - | - | - | 0.201 | 0.027 | 0.180 | 0.099 |
| 17 | 2,2,3-Trimethylhexane | - | 0.032 | 0.015 | 0.023 | 0.031 | 0.027 | 0.029 | 0.044 | 0.052 | 0.034 | 0.074 | 0.024 |
| 18 | Benzyl alcohol | 0.106 | 0.019 | 0.026 | 0.041 | 0.034 | 0.068 | - | 0.067 | 0.086 | 0.051 | - | - |
| 19 | Phenylacetaldehyde | 0.077 | 0.026 | 0.024 | 0.031 | - | 0.050 | - | 0.036 | 0.061 | 0.061 | - | - |
| 20 | 2-Methylnonane | - | - | - | 0.047 | - | - | 0.045 | 0.018 | - | 0.040 | - | 0.101 |
| 21 | (E)-2-Octenal | 0.120 | 0.061 | 0.029 | 0.042 | 0.042 | 0.078 | 0.023 | 0.029 | 0.094 | 0.127 | 0.147 | 0.037 |
| 22 | (E)-2-Octen-1-ol | 0.070 | - | - | - | 0.015 | 0.048 | - | - | - | - | - | - |
| 23 | 3,5-Octadien-2-one | 0.081 | - | 0.027 | 0.027 | 0.032 | 0.034 | - | - | 0.080 | 0.085 | - | - |
| 24 | Methyl benzoate | 0.141 | 0.079 | 0.419 | 0.723 | 0.153 | 0.197 | 0.858 | 0.891 | 0.300 | 0.357 | 4.715 | 1.771 |
| 25 | Linalool | 1.351 | 0.167 | 0.148 | 0.264 | 0.796 | 0.849 | 0.223 | 0.251 | 1.704 | 1.318 | 1.541 | 0.349 |
| 26 | 2-Phenylethanol | 0.217 | 0.039 | 0.048 | 0.089 | 0.046 | 0.041 | 0.060 | 0.068 | 0.157 | 0.167 | 0.163 | 0.080 |
| 27 | Methyl octanoate | 0.104 | 0.112 | - | - | 0.082 | 0.127 | - | - | 0.194 | 0.188 | - | - |
| 28 | Isobutyl hexanoate | - | - | - | - | - | - | - | - | 0.044 | 0.039 | - | - |
| 29 | 2,3-Dimethylundecane | - | - | 0.007 | 0.011 | 0.019 | 0.085 | - | - | 0.044 | - | - | - |
| 30 | 11-Tetradecyn-1-yl acetate | 0.033 | 0.021 | 0.012 | 0.009 | 0.030 | 0.141 | - | - | 0.046 | 0.056 | - | - |
| 31 | 2′-Hydroxyacetophenone | 0.045 | 0.032 | 0.032 | 0.041 | 0.223 | 0.049 | 0.044 | - | 0.039 | 0.050 | - | - |
| 32 | 3-Ethylbenzaldehyde | - | - | - | - | 0.031 | 0.052 | - | - | - | - | - | - |
| 33 | Benzyl acetate | 0.037 | - | - | - | 0.108 | 0.439 | - | 0.015 | 0.039 | 0.048 | - | - |
| 34 | Ethyl benzoate | 0.419 | 0.173 | 0.954 | 1.364 | 0.065 | 0.030 | 0.921 | 1.324 | 0.680 | 0.673 | 8.247 | 2.433 |
| 35 | (E, E)-2,4-Heptadienal | 0.045 | 0.078 | 0.017 | 0.072 | - | 0.024 | - | 0.774 | 0.085 | 0.038 | - | - |
| 36 | Methyl salicylate | 0.066 | 0.023 | 0.078 | 0.193 | - | - | 0.223 | 0.167 | - | - | - | 0.400 |
| 37 | Ethyl octanoate | 0.147 | 0.096 | 0.080 | 0.147 | - | 0.020 | 0.101 | 0.130 | 0.213 | 0.192 | 0.432 | 0.211 |
| 38 | Benzoic acid | - | - | 0.025 | 0.037 | - | - | - | - | - | 0.046 | 0.313 | - |
| 39 | 4,7-Dimethylbenzofuran | 0.163 | 0.032 | 0.173 | 0.252 | - | 0.088 | - | - | 0.052 | - | 1.655 | 0.640 |
| 40 | β-Cyclohomocitral | - | - | 0.074 | 0.061 | - | - | 0.297 | 0.501 | 0.110 | 0.121 | - | - |
| 41 | 9-Methylnonadecane | 0.098 | 0.099 | 0.015 | 0.015 | - | 0.014 | - | - | - | 0.039 | - | - |
| 42 | Ethyl salicylate | - | - | - | 0.015 | 0.021 | 0.040 | - | 0.013 | 3.132 | - | 0.084 | 0.012 |
| 43 | 2-Methyl-1,4-dimethoxybenzene | 0.051 | 0.017 | - | - | - | - | - | - | - | - | - | - |
| 44 | Tridecane | - | - | 0.011 | 0.013 | - | 0.012 | - | - | 0.079 | 0.059 | - | - |
| 45 | 4-Isobutylphenol | 0.024 | 0.020 | - | - | 1.088 | 0.018 | - | - | 0.046 | 0.030 | - | - |
| 46 | Phytane | 0.032 | 0.028 | - | - | - | - | - | - | - | 0.049 | - | - |
| 47 | trans-β-Ionone | 0.072 | 0.059 | 0.015 | 0.010 | - | - | - | - | - | 0.124 | - | - |

Values represent the average content of each compound at each time point across the respective treatment groups. A dash ("-") indicates that the compound was not detected at the specified time point or under the given treatment.

**Table S4 Phytochemicals identified from anaerobic fermented alfalfa.**

| **Peak No.** | **Rt**  **(min)** | **Molecular formula** | **[M-H]⁻ (m/z)** | | | | **Assigned identification** | **References** |
| --- | --- | --- | --- | --- | --- | --- | --- | --- |
| **Theoretical exact mass (Da)** | **Mean measured mass (Da)** | **Mass accuracy (ppm)** | **Other fragment ions of [M-H]- at low energy** |  |  |
| 1 | 18.445 | C23H28O12 | 495.1501 | 495.1521 | 4.04 | 281, 151, 137 | Oxypaeoniflorin isomer | [1] |
| 2 | 19.682 | C29H38O16 | 687.2132 | 687.2142 | 1.46 | 551,459,345 | β-Gentiobiosylpaeoniflorin | [2] |
| 3 | 24.667 | C29H38O16 | 641.2072 | 641.2168 | 14.97 | 611, 519, 323 | Isomaltopaeoniflorin | [1] |
| 4 | 28.516 | C37H34O20 | 797.1571 | 797.1569 | -0.25 | 603, 369, 269, 193 | 4’-O-[2’-O-E-feruloyl-O-β-D-glucuronopyranosyl]- (1→2)-O-β-D-glucuronopyranoside apigenin | [3] |
| 5 | 28.975 | C33H33O23 | 797.1407 | 797.1569 | -20.33 | 621, 269 | 7-O-[β-d-glucuronopyranosyl-(1→2)-O-β-d-glucuronopyranosyl]-4’-O-β-D-glucuronopyranoside apigenin | [4] |
| 6 | 29.530 | C39H37O22 | 857.1771 | 857.1730 | -4.78 | 527, 329 | 7-O-[2’-O-feruloyl-β-D-glucuronopyranosyl-(1→2)-O-β-D-glucuronopyranoside tricin | [3] |
| 7 | 35.155 | C38H35O21 | 827.1672 | 827.1613 | -7.13 | 667, 351, 269 | 7-O-[2’-O-sinapoyl-β-d-glucuronopyranosyl-(1→2)-O-β-D-glucuronopyranoside] apigenin | [5] |
| 8 | 47.975 | C15H10O6 | 285.0399 | 285.0426 | 9.472 | 255, 151 | Kaempferol | [6] |
| 9 | 52.800 | C30H18O10 | 453.1338 | 453.1458 | 26.27 | 359, 225, 119 | Ampelopsin B | [7] |
| 10 | 55.168 | C17H14O7 | 329.0662 | 329.0681 | 5.78 | 299, 227 | Tricin | [8] |
| 11 | 55.501 | C15H10O5 | 269.0450 | 269.0471 | 7.81 | 117, 107, 121 | Apigenin | [8] |
| 12 | 56.577 | C16H12O6 | 299.0556 | 299.0576 | 6.69 | 284, 125 | Chrysoeriol | [8] |
| 13 | 57.673 | C42H32O9 | 679.1961 | 679.1990 | 4.27 | 661、637 | resveratrol trimers（1） | [1, 9] |
| 14 | 58.788 | C42H32O9 | 679.1961 | 679.1990 | 4.27 | 661、637 | resveratrol trimers（2） | [1, 9] |

Peaks 13 and 14 were tentatively assigned as isomeric resveratrol trimers, designated as (1) and (2), respectively.

**Reference**

1. Nie R, Zhang Y, Jin Q, Zhang S, Wu G, Chen L, et al. Identification and characterisation of bioactive compounds from the seed kernels and hulls of *Paeonia lactiflora* Pall by UPLC-QTOF-MS. Food Res Int. 2021;139:109916.

2. Zheng Y, Li P, Shen J, Yang K, Wu X, Wang Y, et al. Comprehensive comparison of different parts of *Paeonia ostii*, a food-medicine plant, based on untargeted metabolomics, quantitative analysis, and bioactivity analysis. Front Plant Sci. 2023;14:1243724.

3. Stochmal A, Simonet AM, Macias FA, Oleszek W. Alfalfa (*Medicago sativa* L.) flavonoids. 2. tricin and chrysoeriol glycosides from aerial parts. J Agric Food Chem. 2001;49(11):5310-4.

4. Stochmal A, Piacente S, Pizza C, De Riccardis F, Leitz R, Oleszek W. Alfalfa (*Medicago sativa* L.) flavonoids. 1. apigenin and luteolin glycosides from aerial parts. J Agric Food Chem. 2001;49(2):753-8.

5. Kowalska I, Stochmal A, Kapusta I, Janda B, Pizza C, Piacente S, et al. Flavonoids from Barrel Medic (*Medicago truncatula*) Aerial Parts. J Agric Food Chem. 2007;55(7):2645-52.

6. March RE, Miao X. A fragmentation study of kaempferol using electrospray quadrupole time-of-flight mass spectrometry at high mass resolution. Int J Mass Spectrom. 2004;231(2):157-67.

7. Liu Z, Li M, Qian D, Liu Z, Shu Q. Phytochemical profiles and the hypoglycemic effects of tree peony seed coats. Food Funct. 2021;12(23):11777-89.

8. Goławska S, Łukasik I, Kapusta T, Janda B. Analysis of flavonoids content in alfalfa. Ecological Chemistry and Engineering A. 2010;17(2-3):261-7.

9. Sarker SD, Whiting P, Dinan L, Šik V, Rees HH. Identification and ecdysteroid antagonist activity of three resveratrol trimers (suffruticosols A, B and C) from *Paeonia suffruticosa*. Tetrahedron. 1999;55(2):513-24.
